# Supplementary material for: Regulation of microtubule disassembly by spatially heterogeneous patterns of acetylation
Source: Royal Society of Chemistry journal article supplement (doi:10.1039/c9sm02198a), 2020-01-01
Supplement: c9sm02198a1.pdf [file c9sm02198a1.pdf]

## Supplementary Information: Regulation of Microtubule Disassembly by Spatially Heterogeneous Patterns of Acetylation

Aparna J S, Ranjith Padinhateeri, Dibyendu Das  
Indian Institute of Technology Bombay

### S1. Determining the parameters used in the simulations

1) For a lattice consisting entirely of GTP-bound tubulin subunits, the lateral interaction energies are estimated to be in the range  $-6k_B T \lesssim g_l \lesssim -3k_B T$  in Stukalin *et al* [1, 2]. In our simulations we fix the lateral interaction energy of the completely deacetylated GTP-lattice to be  $-4.5k_B T$ .

2) The mean disassembly rate of a GTP lattice measured from experiments is  $\approx 0.5\mu\text{m min}^{-1}$  [3]. Accordingly,  $R_d$  is fixed from the simulations at  $432\mu\text{m min}^{-1}$  ( $\alpha$  is assumed to be 0 in all our simulations).

3) The mean growth rate of a GTP lattice measured from a set of experiments is  $\approx 0.17\mu\text{M}^{-1}\mu\text{m min}^{-1}$  [3]. Accordingly,  $R_a$  is fixed from the simulations at  $0.17C\mu\text{m min}^{-1}$  (since  $\alpha = 0$ ), where  $C$  is the concentration of the free tubulin.

4) With  $R_d$  fixed, the lateral interaction energy of the completely deacetylated lattice consisting of only GDP-subunits, is fixed at  $g_l^0 = -2.85k_B T$  such that the disassembly rate is  $\approx 8\mu\text{m min}^{-1}$  as measured from experiments [4].

5)

i) *In vitro* experiments have observed that the presence of acetylation reduces the lateral interaction between neighbouring protofilaments [4]. In order to accommodate this in the model, we consider that if the  $i^{\text{th}}$  subunit is acetylated or if any of the neighbours (lateral and longitudinal) of this subunit in the lattice is acetylated, then the lateral interaction energy associated with  $u_i$  and  $w_i$  are modified accordingly.

ii) In the experiments of Portran *et al* [4], it was observed that in the presence of 96% acetylation, the disassembly rate of the MT lattice is  $\approx 20\mu\text{m min}^{-1}$ , three fold increased compared to the case at zero percent acetylation. Assuming that this disassembly rate is composed of the depolymerisation rate of GDP-subunits

alone, the modified lateral interaction energy of the GDP-subunits under the effect of acetylation is fixed at  $g_l^{ac} = -2.25k_B T$  such that at 100% acetylation, disassembly rate of the filament is  $\approx 20\mu\text{m min}^{-1}$ .

## References

- [1] Stukalin EB, Kolomeisky AB. Simple growth models of rigid multifilament biopolymers. *J Chem Phys.* 2004;121(2).
- [2] Stukalin EB, Kolomeisky AB. Polymerization dynamics of double-stranded biopolymers: Chemical kinetic approach. *J Chem Phys.* 2005;122(10). doi:<http://dx.doi.org/10.1063/1.1858859>.
- [3] Gardner M, Charlebois B, Jánosi I, Howard J, Hunt A, Odde D. Rapid Microtubule Self-Assembly Kinetics. *Cell.* 2011;146(4):582 – 592. doi:<https://doi.org/10.1016/j.cell.2011.06.053>.
- [4] Portran D, Schaedel L, Xu Z, Thery M, Nachury MV. Tubulin acetylation protects long-lived microtubules against mechanical ageing. *Nat Cell Biol.* 2017;19(4):391 – 398.
